# Supplementary material for: Intervertebral Disc Disease of the Lumbar Spine in Health Personnel with Occupational Exposure to Patient Handling—A Systematic Literature Review and Meta-Analysis
Source: MDPI journal article supplement (doi:10.3390/ijerph17134832), 2020-07-04
Supplement: s1 [file s1]

# Supplementary file 4

**Table S10.** Sensitivity analysis of studies included in the quantitative analysis (meta-analysis)

| Excluded study/group | Tau <sup>2</sup> | Chi <sup>2</sup> ; df [p-value] | I <sup>2</sup> | OR [95%CI]        |
|----------------------|------------------|---------------------------------|----------------|-------------------|
| --                   | 0.15             | 6.60; 4 [0.16]                  | 39%            | 2.45 [1.41, 4.26] |
| Heliovaara 1987 †    | 0.27             | 6.27, 3 [0.10]                  | 52%            | 2.72 [1.34, 5.55] |
| Savage 1997 ¶        | 0.00             | 2.70, 3 [0.44]                  | 0%             | 3.02 [1.84, 4.95] |
| Hartwig 1997 †       | 0.07             | 3.98, 3 [0.26]                  | 25%            | 2.13 [1.28, 3.53] |
| Michaelis 2001 ‡     | 0.24             | 5.91, 3 [0.12]                  | 49%            | 2.31 [1.15, 4.63] |
| D'Agostin 2017 †     | 0.24             | 5.91, 3 [0.12]                  | 49%            | 2.32 [1.15, 4.65] |

† Nurses; ‡ Nurses & geriatric nurses; ¶ Hospital porters & ambulance men

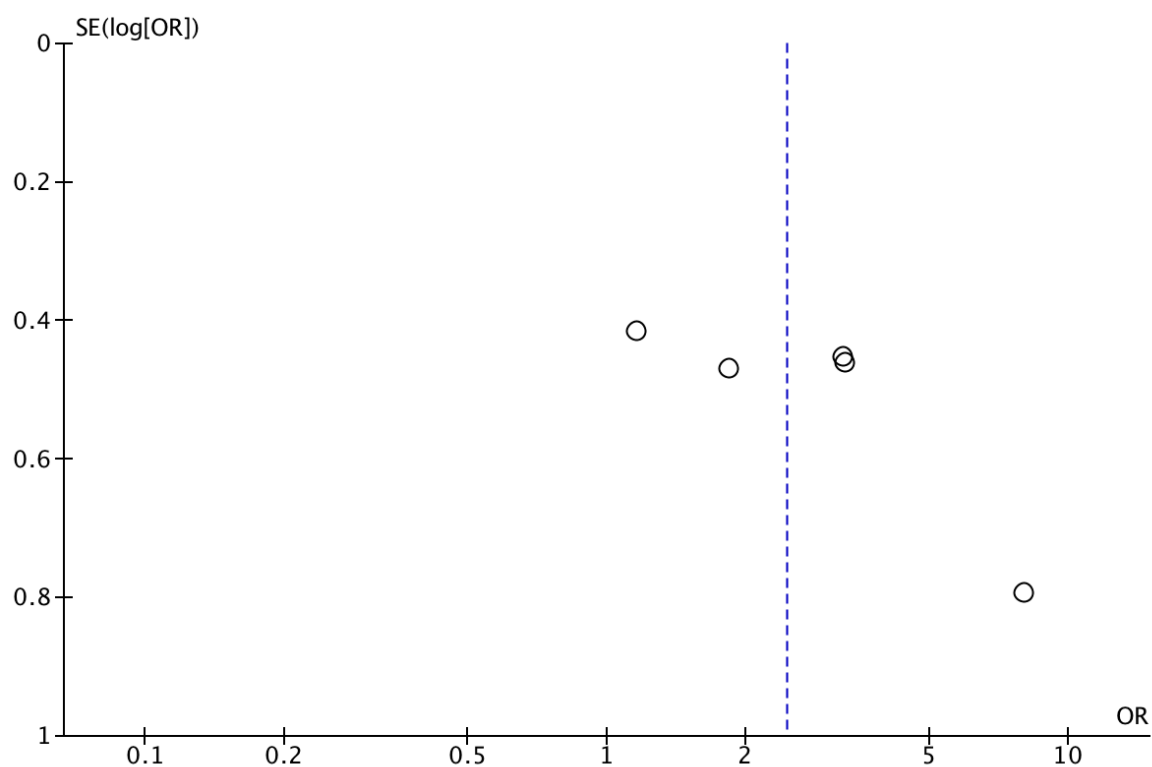

**Figure S1.** Funnel plot of studies included in the quantitative analysis (meta-analysis)
