# Supplementary material for: Intervertebral Disc Disease of the Lumbar Spine in Health Personnel with Occupational Exposure to Patient Handling—A Systematic Literature Review and Meta-Analysis
Source: MDPI journal article supplement (doi:10.3390/ijerph17134832), 2020-07-04
Supplement: s1 [file s1]

**Supplementary file 1 – A proposed reporting checklist for authors, editors and reviewers of meta-analyses of observational studies in epidemiology (MOOSE)**

**Table S1. MOOSE (Meta-analyses Of Observational Studies in Epidemiology) Checklist**

| Checklist                                                                                                                                                                                                                                                                         | Yes/no/<br>n.a. |
|-----------------------------------------------------------------------------------------------------------------------------------------------------------------------------------------------------------------------------------------------------------------------------------|-----------------|
| <b>Reporting of background</b>                                                                                                                                                                                                                                                    |                 |
| 1. Problem definition                                                                                                                                                                                                                                                             | Yes             |
| 2. Hypothesis statement                                                                                                                                                                                                                                                           | Yes             |
| 3. Description of study outcome                                                                                                                                                                                                                                                   | Yes             |
| 4. Type of exposure or intervention used                                                                                                                                                                                                                                          | Yes             |
| 5. Type of study design used                                                                                                                                                                                                                                                      | Yes             |
| 6. Study population                                                                                                                                                                                                                                                               | Yes             |
| <b>Reporting of search strategy should include</b>                                                                                                                                                                                                                                |                 |
| 7. Qualification of searchers (e.g. librarians)                                                                                                                                                                                                                                   | Yes             |
| 8. Search strategy, including time period included in the synthesis and keywords                                                                                                                                                                                                  | Yes             |
| 9. Effort to include all available studies, including contact with authors                                                                                                                                                                                                        | Yes             |
| 10. Databases and registries searched                                                                                                                                                                                                                                             | Yes             |
| 11. Search software used, name, version, including special features used (e.g. explosion)                                                                                                                                                                                         | Yes             |
| 12. Use of hand searching (e.g. reference lists of obtained studies)                                                                                                                                                                                                              | Yes             |
| 13. List of citations located and those excluded, including justification                                                                                                                                                                                                         | Yes             |
| 14. Method of addressing articles published in languages other than English                                                                                                                                                                                                       | Yes             |
| 15. Methods of handling abstracts and unpublished studies                                                                                                                                                                                                                         | No <sup>1</sup> |
| 16. Description of any contact with authors                                                                                                                                                                                                                                       | Yes             |
| <b>Reporting of methods should include</b>                                                                                                                                                                                                                                        |                 |
| 17. Description of relevance or appropriateness of studies assembled for assessing the hypothesis to be tested                                                                                                                                                                    | Yes             |
| 18. Rationale for the selection and coding of data                                                                                                                                                                                                                                | Yes             |
| 19. Documentation of how data were classified and coded (e.g. multiple raters, blinding and interrater reliability)                                                                                                                                                               | Yes             |
| 20. Assessment of confounding (e.g. comparability of cases and controls in studies where appropriate)                                                                                                                                                                             | Yes             |
| 21. Assessment of study quality, including blinding of quality assessors, stratification or regression possible predictors of study results                                                                                                                                       | Yes             |
| 22. Assessment of heterogeneity                                                                                                                                                                                                                                                   | Yes             |
| 23. Description of statistical methods (e.g. complete description of fixed or random effect models, justification of whether the chosen models account for predictors of study results, dose-response models, or cumulative meta- analysis) in sufficient detail to be replicated | Yes             |
| 24. Provision of appropriate tables and graphics                                                                                                                                                                                                                                  | Yes             |
| <b>Reporting of results should include</b>                                                                                                                                                                                                                                        |                 |
| 25. Graphic summarising individual study estimates and overall estimate                                                                                                                                                                                                           | Yes             |
| 26. Table giving descriptive information for each study included                                                                                                                                                                                                                  | Yes             |
| 27. Results of sensitivity testing (e.g. subgroup analysis)                                                                                                                                                                                                                       | Yes             |
| 28. Indication of statistical uncertainty of findings                                                                                                                                                                                                                             | Yes             |
| <b>Reporting of discussion should include</b>                                                                                                                                                                                                                                     |                 |
| 29. Quantitative assessment of bias (e.g. publication bias)                                                                                                                                                                                                                       | Yes             |
| 30. Justification for exclusion (e.g. exclusion of non-English-language yes citations)                                                                                                                                                                                            | Yes             |
| 31. Assessment of quality of the included studies                                                                                                                                                                                                                                 | Yes             |

**Reporting of conclusions should include**

- |                                                                                                                                    |            |
|------------------------------------------------------------------------------------------------------------------------------------|------------|
| 32. Consideration of alternative explanations for the observed results                                                             | <b>Yes</b> |
| 33. Generalization of the conclusions (i.e. appropriate for the data presented yes and within the domain of the literature review) | <b>Yes</b> |
| 34. Guidelines for future research                                                                                                 | <b>Yes</b> |
| 35. Disclosure of funding source                                                                                                   | <b>Yes</b> |

---

<sup>1</sup>We did not attempt to identify unpublished data.
