# Supplementary material for: Intervertebral Disc Disease of the Lumbar Spine in Health Personnel with Occupational Exposure to Patient Handling—A Systematic Literature Review and Meta-Analysis
Source: MDPI journal article supplement (doi:10.3390/ijerph17134832), 2020-07-04
Supplement: s1 [file s1]

### **Supplementary file 3: Newcastle-Ottawa quality assessment form for cohort studies, case-control studies and cross-sectional studies**

Note: A study can be given a maximum of one star (+) for each numbered item within the Selection and Outcome categories. A maximum of two stars can be given for Comparability.

#### **Selection**

- 1) Representativeness of the exposed cohort
  - a) Truly representative +
  - b) Somewhat representative +
  - c) Selected group
  - d) No description of the derivation of the cohort
- 2) Selection of the non-exposed cohort
  - a) Drawn from the same community as the exposed cohort +
  - b) Drawn from a different source
  - c) No description of the derivation of the non-exposed cohort
  - d) comparison within the group
- 3) Ascertainment of exposure
  - a) Secure record (e.g., surgical record) +
  - b) Structured interview +
  - c) Written self-report
  - d) No description
  - e) Other
- 4) Demonstration that outcome of interest was not present at start of study
  - a) Yes +
  - b) No

#### **Comparability**

- 1) Comparability of cohorts on the basis of the design or analysis controlled for confounders
  - a) The study controls for age and sex ++
  - b) The study controls for age or sex +
  - c) The study controls other factors, but not age or sex: \_\_\_\_\_
  - d) Cohorts are not comparable on the basis of the design or analysis controlled for confounders

#### **Outcome**

- 1) Assessment of outcome
  - a) Independent blind assessment +
  - b) Record linkage +
  - c) Self report
  - d) No description
  - e) Other
- 2) Was follow-up long enough for outcomes to occur
  - a) Yes +
  - b) No
- 3) Were objective standard criteria used for measurement of the condition
  - a) MRI +
  - b) ICD
- 4) Adequacy of follow-up of cohorts
  - a) Complete follow up- all subject accounted for +
  - b) Subjects lost to follow up unlikely to introduce bias-number lost less than or equal to 20% or description of those lost suggested no different from those followed. +
  - c) Follow up rate less than 80% and no description of those lost
  - d) No statement

Thresholds for converting the Newcastle-Ottawa scales to AHRQ standards (good, fair, and poor):

**Good quality:** 3 or 4 stars in selection domain **AND** 1 or 2 stars in comparability domain **AND** 3 or 4 stars in outcome/exposure domain

**Fair quality:** 2 stars in selection domain **AND** 1 or 2 stars in comparability domain **AND** 2 or 3 stars in outcome/exposure domain

**Poor quality:** 0 or 1 star in selection domain **OR** 0 stars in comparability domain **OR** 0 or 1 stars in outcome/exposure domain

**Table S6.** Quality assessment of included cohort studies

| <b>Author,<br/>year</b>   | <b>Selection<br/>(Maximum 4 +)</b> | <b>Comparability<br/>(Maximum 2 +)</b> | <b>Outcome<br/>(Maximum 3 +)</b> | <b>Study<br/>quality*</b> |
|---------------------------|------------------------------------|----------------------------------------|----------------------------------|---------------------------|
| Heliovaara<br>et al. 1987 | 1b; 2a; 3b; 4b (+++)               | 1a (++)                                | 1b; 2a; 3b; 4d (++)              | ++                        |
| Chung<br>et al. 2013      | 1a; 2a; 3a; 4a (++++)              | 1a (++)                                | 1b; 2a; 3b; 4d (+++)             | +++                       |
| Makino<br>et al. 2017     | 1b; 2d; 3a; 4b (++)                | 1b (+)                                 | 1a; 2a; 3a; 4c (+++)             | ++                        |

\* AHRQ standard: good (+++), fair (++) and poor (+)

## **NEWCASTLE - OTTAWA QUALITY ASSESSMENT SCALE (adapted for cross sectional studies)**

This scale has been adapted from the Newcastle-Ottawa Quality Assessment Scale for cohort studies to perform a quality assessment of cross-sectional studies for the systematic review, "Are Healthcare Workers' Intentions to Vaccinate Related to their Knowledge, Beliefs and Attitudes? A Systematic Review".

### **Selection (Maximum 4 +)**

- 1) Representativeness of the sample:
  - a) Truly representative of the average in the target population. + (all subjects or random sampling)
  - b) Somewhat representative of the average in the target population. + (non-random sampling)
  - c) Selected group of users.
  - d) No description of the sampling strategy.
- 2) Sample size:
  - a) Justified and satisfactory. +
  - b) Not justified.
- 3) Non-respondents:
  - a) Comparability between respondents and non-respondents characteristics is established, and the response rate is satisfactory. +
  - b) The response rate is unsatisfactory, or the comparability between respondents and non-respondents is unsatisfactory.
  - c) No description of the response rate or the characteristics of the responders and the non-responders.
- 4) Ascertainment of the exposure (risk factor):
  - a) Validated measurement tool. ++
  - b) Non-validated measurement tool, but the tool is available or described. +
  - c) No description of the measurement tool.

### **Comparability**

- 1) The subjects in different outcome groups are comparable, based on the study design or analysis.

Confounding factors are controlled.

- a) The study controls for the age and sex. ++
- b) The study controls for age or sex. +
- c) The study controls for confounding, but not age or sex.
- d) No confounder control in analyses and no matching

### **Outcome**

- 1) Assessment of the outcome:
  - a) Independent blind assessment. ++
  - b) Record linkage. ++
  - c) Self report. +
  - d) No description.
- 2) Statistical test:
  - a) The statistical test used to analyze the data is clearly described and appropriate, and the measurement of the association is presented, including confidence intervals and the probability level (p value). +
  - b) The statistical test is not appropriate, not described or incomplete.
- 3) Were objective standard criteria used for measurement of the condition
  - a) MRI +
  - b) ICD

Thresholds for converting the Newcastle-Ottawa scales to AHRQ standards (good, fair, and poor):

**Good quality:** 3 or 4 stars in selection domain **AND** 1 or 2 stars in comparability domain **AND** 3 or 4 stars in outcome/exposure domain

**Fair quality:** 2 stars in selection domain **AND** 1 or 2 stars in comparability domain **AND** 2 or 3 stars in outcome/exposure domain

**Poor quality:** 0 or 1 star in selection domain **OR** 0 stars in comparability domain **OR** 0 or 1 stars in outcome/exposure domain

**Table S7.** Quality assessment of included cross-sectional studies

| Author,<br>year          | Selection<br>(Maximum 4 +) | Comparability<br>(Maximum 2 +) | Outcome<br>(Maximum 3 +) | Study<br>quality* |
|--------------------------|----------------------------|--------------------------------|--------------------------|-------------------|
| Hartwig<br>et al. 1997   | 1c; 2b; 3c; 4c (-)         | 1d (-)                         | 1d; 2b; 3a (+)           | +                 |
| Savage<br>et al. 1997    | 1d; 2b; 3c; 4a (++)        | 1c (-)                         | 1a; 2b; 3a (+++)         | +                 |
| D'Agostin<br>et al. 2017 | 1a; 2a; 3c; 4a<br>(++++)   | 1d (-)                         | 1b; 2c; 3a (+++)         | +                 |

\* AHRQ standard: good (+++), fair (++) and poor (+)

## **Newcastle-Ottawa Quality Assessment Form for Case-Control Studies**

Note: A study can be awarded a maximum of one star (+) for each numbered item within the Selection and Exposure categories. A maximum of two stars can be given for Comparability.

### **Selection**

- 1) Is the case definition adequate?
  - a) yes, with independent validation +
  - b) yes, e.g., record linkage or based on self-reports
  - c) other data
  - d) no description
- 2) Representativeness of the cases
  - a) consecutive or obviously representative series of cases +
  - b) potential for selection biases or not stated
- 3) Selection of Controls
  - a) community controls +
  - b) hospital controls
  - c) no description
- 4) Definition of Controls
  - a) no history of disease (endpoint) +
  - b) no description of source

### **Comparability**

- 1) Comparability of cases and controls on the basis of the design or analysis
  - a) The study controls for age and sex ++
  - b) The study controls for age or sex +
  - c) The study controls other factors, but not age or sex: \_\_\_\_\_
  - d) Cohorts are not comparable on the basis of the design or analysis controlled for confounders

### **Exposure**

- 1) Ascertainment of exposure
  - a) secure record (e.g. surgical records) +
  - b) structured interview where blind to case/control status +
  - c) interview not blinded to case/control status)
  - d) written self-report or medical record
- 2) Same method of ascertainment for cases and controls
  - a) Yes +
  - b) No
- 3) Non-Response rate
  - a) same rate for both groups +
  - b) non respondents described
  - c) rate different and no designation

Thresholds for converting the Newcastle-Ottawa scales to AHRQ standards (good, fair, and poor):

**Good quality:** 3 or 4 stars in selection domain **AND** 1 or 2 stars in comparability domain **AND** 3 or 4 stars in outcome/exposure domain

**Fair quality:** 2 stars in selection domain **AND** 1 or 2 stars in comparability domain **AND** 2 or 3 stars in outcome/exposure domain

**Poor quality:** 0 or 1 star in selection domain **OR** 0 stars in comparability domain **OR** 0 or 1 stars in outcome/exposure domain

**Table S8.** Quality assessment of included case-control studies

| Author,<br>year          | Selection<br>(Maximum 4 +) | Comparability<br>(Maximum 2 +) | Exposure<br>(Maximum 3 +) | Study<br>quality* |
|--------------------------|----------------------------|--------------------------------|---------------------------|-------------------|
| Michaelis<br>et al. 2001 | 1a; 2b; 3a; 4a (+++)       | 1a (++)                        | 1d; 2a; 3a (++)           | +++               |

\* AHRQ standard: good (+++), fair (++) and poor (+)

## References

Modesti PA, Reboldi G, Cappuccio FP, et al. Panethnic Differences in Blood Pressure in Europe: A Systematic Review and Meta-Analysis. PLoS One. 2016;11(1):e0147601. Published 2016 Jan 25. doi:10.1371/journal.pone.0147601

Wells, G.; Shea, B.; O'Connell, D.; Peterson, j.; Welch, V.; Losos, M.; Tugwell, P. The Newcastle–Ottawa Scale (NOS) for Assessing the Quality of Non-Randomized Studies in Meta-Analysis. 2000.
