# Supplementary material for: Intervertebral Disc Disease of the Lumbar Spine in Health Personnel with Occupational Exposure to Patient Handling—A Systematic Literature Review and Meta-Analysis
Source: MDPI journal article supplement (doi:10.3390/ijerph17134832), 2020-07-04
Supplement: s1 [file s1]

Supplementary file 4

Table S9. Detailed judgment for risk of bias assessments.

| Author,<br>year         | Bias                                                         | Author's<br>judgment | Support for judgment                                                                              |
|-------------------------|--------------------------------------------------------------|----------------------|---------------------------------------------------------------------------------------------------|
| Heliovaara,<br>1987     | Random sequence generation<br>(selection bias)               | High risk            | No randomisation possible<br>due to research question.                                            |
|                         | Allocation concealment<br>(selection bias)                   | High risk            | Allocation was made by the professional title<br>and could therefore not be concealed.            |
|                         | Blinding of participants and<br>personnel (performance bias) | High risk            | Exposure impossible to blind.                                                                     |
|                         | Blinding of outcome<br>assessment (detection bias)           | Unclear<br>risk      | Outcome was adopted from existing ICD codes.                                                      |
|                         | Incomplete outcome data<br>(attrition bias)                  | Low risk             | No losses to follow-up.                                                                           |
|                         | Selective reporting<br>(reporting bias)                      | Low risk             | Pre-specified outcome was reported.                                                               |
| Author,<br>year         | Bias                                                         | Author's<br>judgment | Support for judgment                                                                              |
| Hartwig<br>et al., 1997 | Random sequence generation<br>(selection bias)               | High risk            | No randomisation possible<br>due to research question.                                            |
|                         | Allocation concealment<br>(selection bias)                   | High risk            | Allocation was made by the professional title<br>and could therefore not be concealed.            |
|                         | Blinding of participants and<br>personnel (performance bias) | High risk            | Exposure impossible to blind.                                                                     |
|                         | Blinding of outcome<br>assessment (detection bias)           | Unclear<br>risk      | No information provided.                                                                          |
|                         | Incomplete outcome data<br>(attrition bias)                  | Low risk             | Cross sectional analysis.                                                                         |
|                         | Selective reporting (reporting<br>bias)                      | Low risk             | Pre-specified outcome was reported.                                                               |
| Author,<br>year         | Bias                                                         | Author's<br>judgment | Support for judgment                                                                              |
| Savage<br>et al., 1997  | Random sequence generation<br>(selection bias)               | High risk            | No randomisation possible<br>due to research question.                                            |
|                         | Allocation concealment<br>(selection bias)                   | High risk            | Allocation was made by the professional title<br>and could therefore not be concealed.            |
|                         | Blinding of participants and<br>personnel (performance bias) | High risk            | Exposure impossible to blind.                                                                     |
|                         | Blinding of outcome<br>assessment (detection bias)           | Unclear<br>risk      | Scans were independently assessed<br>by two radiologists.<br>No further information was provided. |
|                         | Incomplete outcome data<br>(attrition bias)                  | High risk            | 89 (60%) of the original study population.<br>Losses likely to affect the final results.          |
|                         | Selective reporting (reporting<br>bias)                      | Low risk             | Pre-specified outcome was reported.                                                               |

Table Sx. (continued)

| Author,<br>year            | Bias                                                         | Author's<br>judgment | Support for judgment                                                                                  |
|----------------------------|--------------------------------------------------------------|----------------------|-------------------------------------------------------------------------------------------------------|
| Michaelis et<br>al., 2002  | Random sequence generation<br>(selection bias)               | High risk            | No randomisation possible<br>due to research question.                                                |
|                            | Allocation concealment<br>(selection bias)                   | High risk            | Allocation was made by the professional title<br>and could therefore not be concealed.                |
|                            | Blinding of participants and<br>personnel (performance bias) | High risk            | Exposure impossible to blind.                                                                         |
|                            | Blinding of outcome<br>assessment (detection bias)           | Unclear<br>Risk      | No information provided.                                                                              |
|                            | Incomplete outcome data<br>(attrition bias)                  | Low risk             | Case-control analysis.                                                                                |
|                            | Selective reporting (reporting<br>bias)                      | Low risk             | Pre-specified outcome was reported.                                                                   |
| Author,<br>year            | Bias                                                         | Author's<br>judgment | Support for judgment                                                                                  |
| Chung<br>et al., 2013      | Random sequence generation<br>(selection bias)               | High risk            | No randomisation possible<br>due to research question.                                                |
|                            | Allocation concealment<br>(selection bias)                   | High risk            | Allocation was made by the professional title<br>and could therefore not be concealed.                |
|                            | Blinding of participants and<br>personnel (performance bias) | High risk            | Exposure impossible to blind.                                                                         |
|                            | Blinding of outcome<br>assessment (detection bias)           | Unclear<br>risk      | Outcome was adopted from existing ICD codes.                                                          |
|                            | Incomplete outcome data<br>(attrition bias)                  | Low risk             | National Health Insurance (NHI) Research<br>Database. No losses.                                      |
|                            | Selective reporting (reporting<br>bias)                      | Low risk             | Pre-specified outcome was reported.                                                                   |
| Author,<br>year            | Bias                                                         | Author's<br>judgment | Support for judgment                                                                                  |
| D'Agostin &<br>Negro, 2017 | Random sequence generation<br>(selection bias)               | High risk            | No randomisation possible<br>due to research question.                                                |
|                            | Allocation concealment<br>(selection bias)                   | High risk            | Allocation was made by the professional title<br>and could therefore not be concealed.                |
|                            | Blinding of participants and<br>personnel (performance bias) | High risk            | Exposure impossible to blind.                                                                         |
|                            | Blinding of outcome<br>assessment (detection bias)           | Unclear<br>risk      | Outcome was assessed on the basis of<br>radiological reports.<br>No further information was provided. |
|                            | Incomplete outcome data<br>(attrition bias)                  | Low risk             | Cross sectional analysis.                                                                             |
|                            | Selective reporting (reporting<br>bias)                      | Low risk             | Pre-specified outcome was reported.                                                                   |

Table Sx. (continued).

| Author,<br>year        | Bias                                                         | Author's<br>judgment | Support for judgment                                                                                                                                              |
|------------------------|--------------------------------------------------------------|----------------------|-------------------------------------------------------------------------------------------------------------------------------------------------------------------|
| Makino<br>et al., 2017 | Random sequence generation<br>(selection bias)               | High risk            | No randomisation possible<br>due to research question.                                                                                                            |
|                        | Allocation concealment<br>(selection bias)                   | High risk            | Allocation was made by the professional title<br>and could therefore not be concealed.                                                                            |
|                        | Blinding of participants and<br>personnel (performance bias) | High risk            | Exposure impossible to blind.                                                                                                                                     |
|                        | Blinding of outcome<br>assessment (detection bias)           | Unclear<br>risk      | Scans were independently assessed<br>by three spine surgeons.<br>No further information was provided.                                                             |
|                        | Incomplete outcome data<br>(attrition bias)                  | High risk            | 261 (75%) participants lost to follow-up.<br>Reasons for the losses were non-response or<br>refusal to participate.<br>Losses likely to affect the final results. |
|                        | Selective reporting (reporting<br>bias)                      | Low risk             | Pre-specified outcome was reported                                                                                                                                |
|                        |                                                              |                      |                                                                                                                                                                   |
